# Supplementary material for: Hepatospecific ablation of p38α MAPK governs liver regeneration through modulation of inflammatory response to CCl4-induced acute injury
Source: PubMed Central journal article supplement (PMC6787013; doi:10.1038/s41598-019-51175-z), 2019-10-10
Supplement: 41598_2019_51175_MOESM1_ESM.pdf [file 41598_2019_51175_MOESM1_ESM.pdf]

# **Hepatospecific ablation of p38 $\alpha$ MAPK governs liver regeneration through modulation of inflammatory response to CCl<sub>4</sub>-induced acute injury**

Manon Fortier<sup>1,2</sup>, Mathilde Cadoux<sup>1,2</sup>, Nadia Boussetta<sup>2</sup>, Sandrine Pham<sup>1,2</sup>, Romain Donné<sup>1,2</sup>,  
Jean-Pierre Couty<sup>1,2</sup>, Chantal Desdouets<sup>1,2, §</sup> and Séverine Celton-Morizur<sup>1,2, §, \*</sup>.

1 Centre de Recherche des Cordeliers, INSERM, Sorbonne Université, USPC, Université Paris Descartes, Université Paris Diderot, Team « Proliferation, Stress and Liver Physiopathology », F-75006 Paris, France.

2 INSERM, U1016, Institut Cochin, Paris, France ; CNRS, UMR8104, Paris, France.

\* Corresponding author : Dr. Séverine Celton-Morizur, Centre de Recherche des Cordeliers, INSERM UMRS 1138. Email: severine.morizur@inserm.fr.

§Authorship note: Chantal Desdouets and Séverine Celton-Morizur contributed equally to this work.

## Supplementary figures

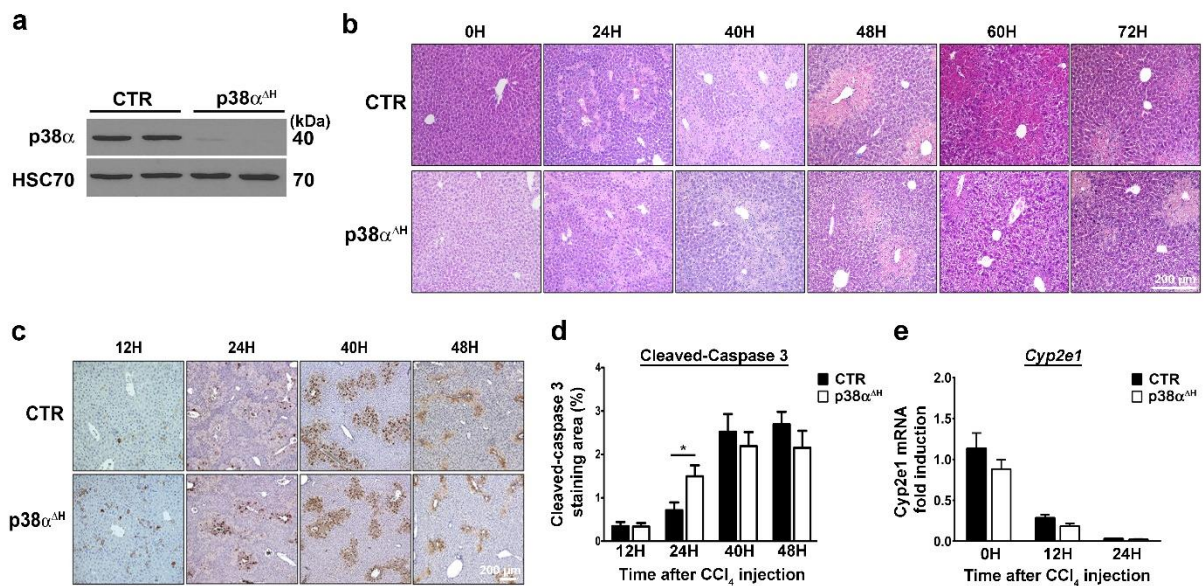

### Supplementary Figure 1. Apoptosis and CCl<sub>4</sub> bioactivation are not impaired in p38 $\alpha^{\Delta H}$ mice during acute liver injury.

- a)** Immunoblot analysis of p38 $\alpha$  isoform in CTR and p38 $\alpha^{\Delta H}$  liver samples in steady state conditions. HSC70 served as a loading control. Lanes show samples from independent biological replicates. The displayed figure was cropped and the original images are part of the supplementary data.
- b)** Magnification of necrotic area related to Figure 2b, in CTR and p38 $\alpha^{\Delta H}$  livers at different times after CCl<sub>4</sub> exposure.
- c)** Representative Cleaved-Caspase 3 immunohistochemistry of CTR and p38 $\alpha^{\Delta H}$  liver sections at indicated time points after CCl<sub>4</sub> injection.
- d)** Quantitative analysis of Cleaved-Caspase 3 labeled CTR and p38 $\alpha^{\Delta H}$  liver sections (percentage of brown area). Data represent the mean  $\pm$  SEM ( $n \geq 4$  per group).

\* $p < 0.05$  (two-tailed t-test).

e) Relative mRNA level of *Cyp2e1* measured by quantitative PCR in CTR and p38 $\alpha^{\Delta H}$  liver samples before (0H) and after CCl<sub>4</sub> injection (12H-24H). Gene expression levels were normalized to the abundance of *18s* mRNA for each sample. Data represent the mean  $\pm$  SEM ( $n \geq 6$  per group).

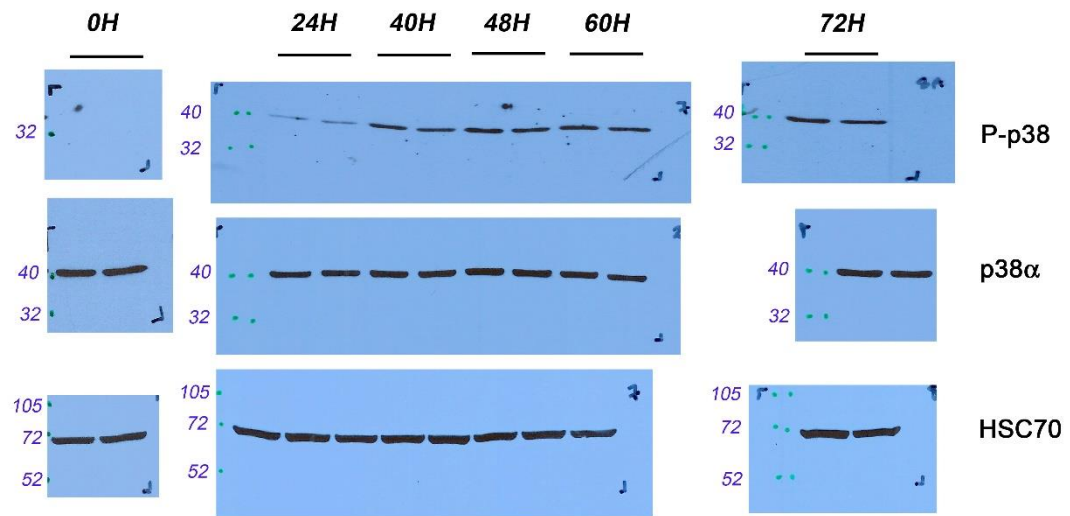

**Supplementary Figure 2. Original pictures from Western blot membranes related to Figure 1b.**

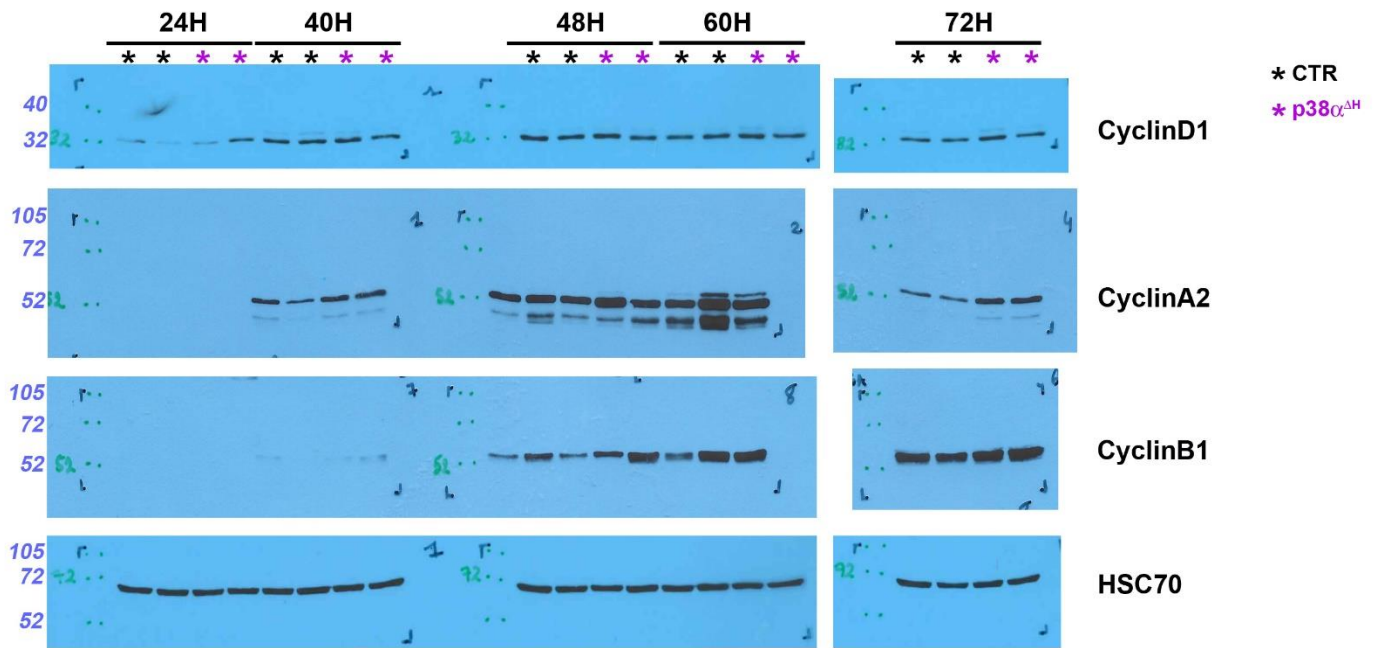

Supplementary Figure 3. Original pictures from Western blot membranes related to Figure 3e.

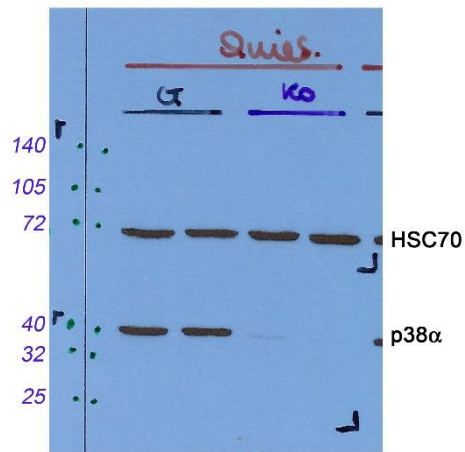

**Supplementary Figure 4. Original pictures from Western blot membranes related to Figure Supplementary 1a.**
